# Supplementary material for: Impact of drug-linker on method selection for analytical characterization and purification of antibody–drug conjugates
Source: Royal Society of Chemistry journal article supplement (doi:10.1039/d4ay00725e), 2024-01-01

## Impact of Drug-Linker on Method Selection for Analytical Characterisation and Purification of Antibody-Drug Conjugates – Supplemental Information

Ling C. Santora<sup>\*a</sup>, Adrian D. Hobson<sup>a</sup>, Lu Wang<sup>a</sup> and Kan X Wu<sup>a</sup>

<sup>a</sup> AbbVie Bioresearch Center, 381 Plantation Street, Worcester, Massachusetts 01605, United States

**Table S1. SEC Spectra for ADC1 - ADC8**

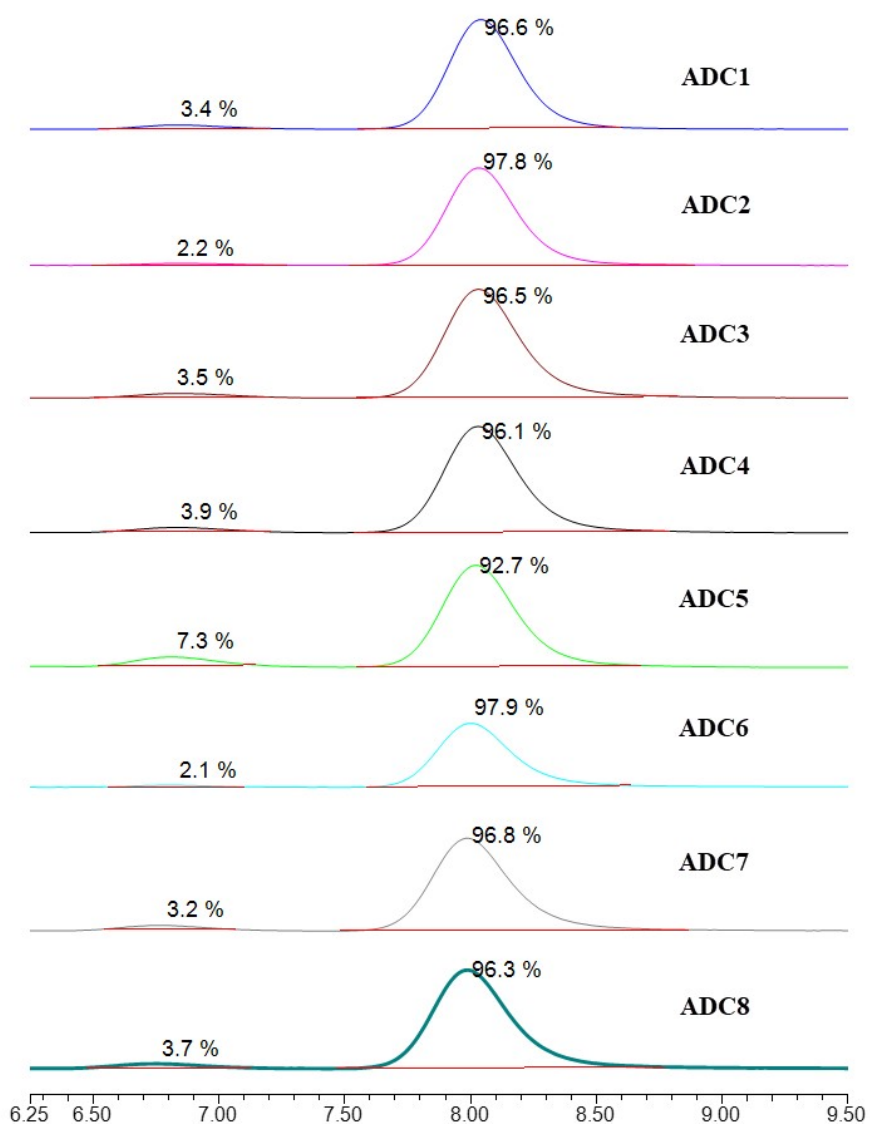

Supplement: d4ay00725e1.pdf [file d4ay00725e1.pdf]
